# Supplementary material for: Functional Assessment of Population and Tumor-Associated APE1 Protein Variants
Source: PubMed Central journal article supplement (PMC3679070; doi:10.1371/journal.pone.0065922), 2013-06-11
Supplement: pone.0065922.s001.pdf [file pone.0065922.s001.pdf]

Figure S1

Q51H

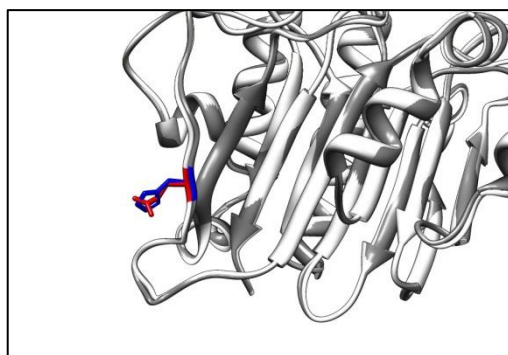

R237C

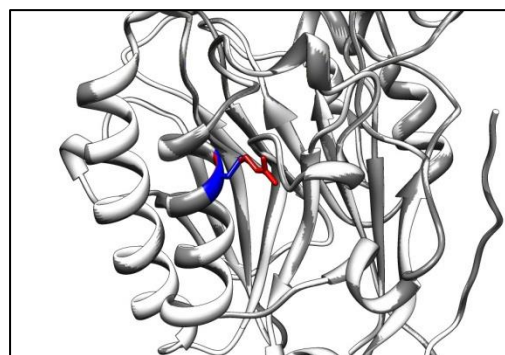

I64V

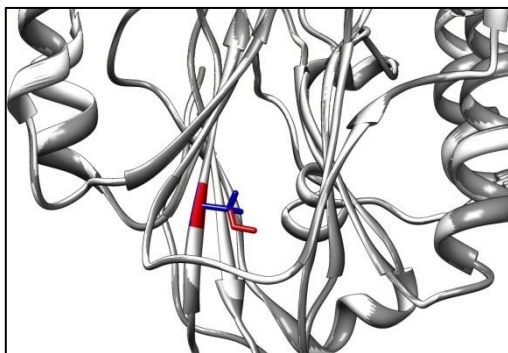

G241R

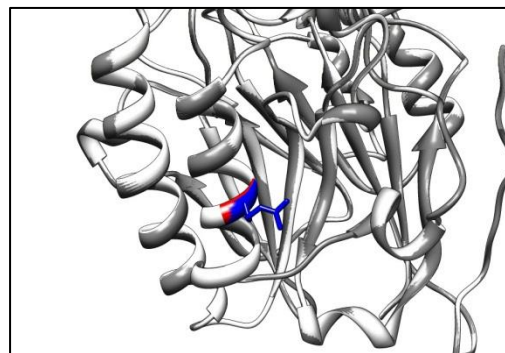

P112L

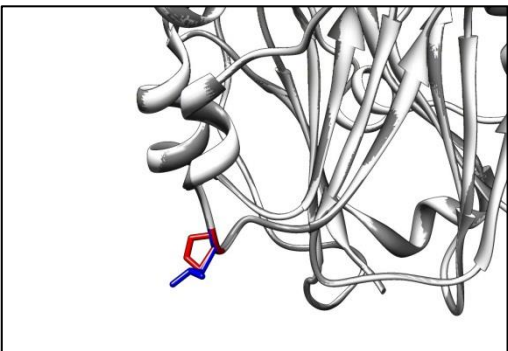

P311S

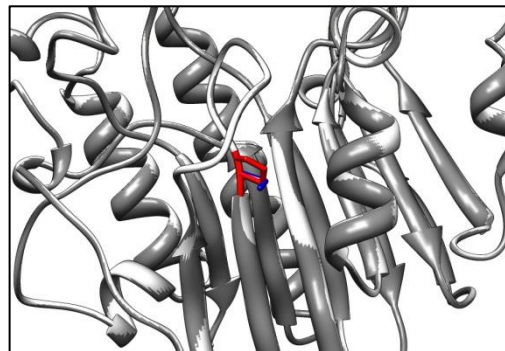

D148E

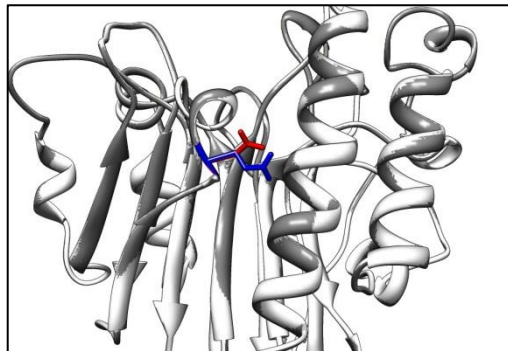

A317V

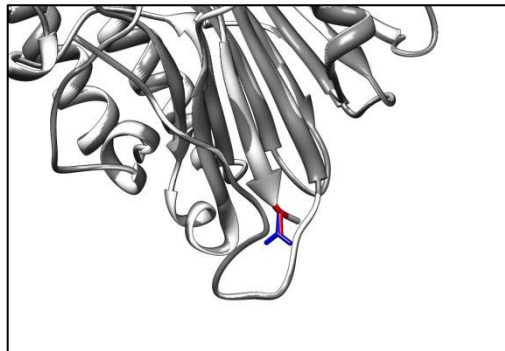

**Figure S1. Molecular modeling of APE1 protein variants.** The wild-type APE1 amino acid sequence was obtained (NCBI accession# AF488551) and changed as per the mutations examined here (Q51H, I64V, P112L, D148E, R237C, G241R, P311S, and A317V). The PDB structure of wild-type APE1 was PDB ID# 1DE8, and the variant models were generated using SWISS-MODEL PDB2PQR (<http://pdb2pqr.sourceforge.net/>). The modeling was analyzed in UCSF Chimera software by overlaying the wild-type amino acids (white backbone, red amino acid) with the variant residue (grey backbone, blue amino acid) to compare alterations in protein integrity.

Figure S2

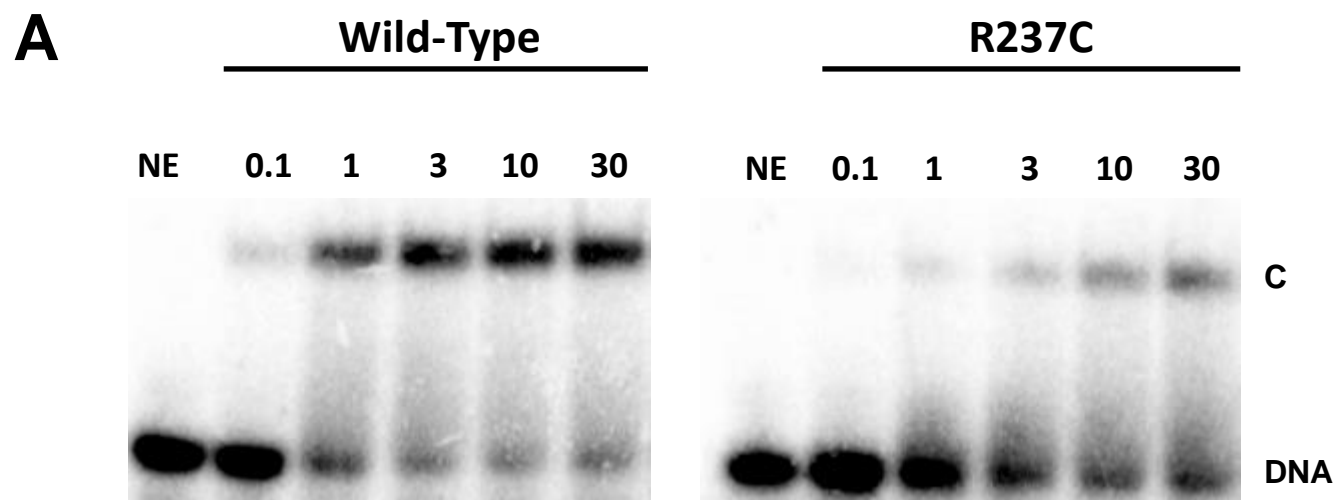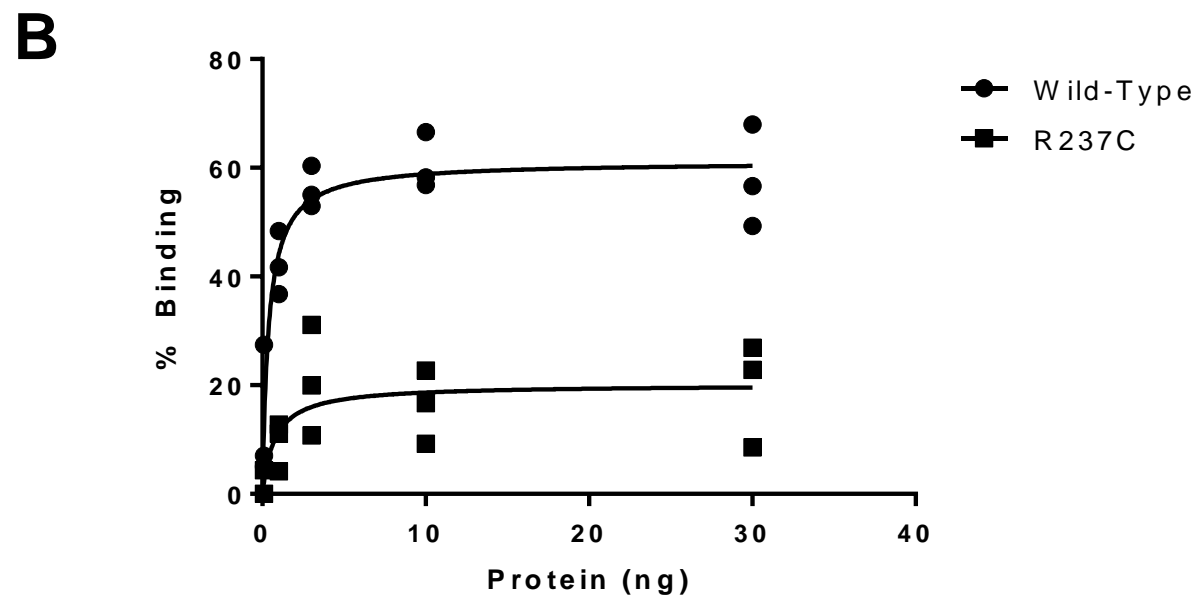

**Figure S2. AP-DNA binding of wild-type and R237C APE1 proteins.** **(A)** Wild-type or R237C variant protein (0.1 to 30 ng, as designated) were incubated with  $^{32}\text{P}$ -labeled 18F NMR DNA (100 fmol), and the binding reactions were resolved on a non-denaturing polyacrylamide gel as described in Materials and Methods. Standard phosphorimager analysis was employed to visualize unbound substrate (DNA) and the APE1-substrate complex (C), with a representative gel image shown. NE = no enzyme. **(B)** Plot of the three independent data points for each protein at the indicated protein concentration. The line of best fit is shown.

**Table S1. Variant primer set for the indicated amino acid change and each oligonucleotide name and sequence.** The mutated codon is underlined.

| <b>Change</b> | <b>Oligonucleotide name and sequence (5'-3'):</b> |                                                           |
|---------------|---------------------------------------------------|-----------------------------------------------------------|
| Q51H          | Q51H-For:                                         | GAC CCC CCA GAT <u>CAC</u> AAA ACC TCA CCC AG             |
|               | Q51H-Rev:                                         | CTG GGT GAG GTT TTG TGA TCT GGG GGG TC                    |
| I64V          | I64V-For:                                         | AAC CTG CCA CAC TCA AGG <u>TCT</u> GCT CTT GGA ATG TG     |
|               | I64V-Rev:                                         | CAC ATT CCA AGA GCA GAC CTT GAG TGT GGC AGG TT            |
| P112L         | P112L-For:                                        | TGA ACT TCA GGA GCT <u>GCT</u> TGG ACT CTC TCA TCA AT     |
|               | P112L-Rev:                                        | ATT GAT GAG AGA GTC CAA GCA GCT CCT GAA GTT CA            |
| D148E         | D148E-For:                                        | CTT ACG GCA TAG <u>GCG</u> <u>AGG</u> AGG AGC ATG ATC AGG |
|               | D148E-Rev:                                        | CCT GAT CAT GCT CCT CCT CGC CTA TGC CGT AAG               |
| R237C         | R237C-For:                                        | CAC GCC ACA AGA <u>GTG</u> <u>CCA</u> AGG CTT CGG         |
|               | R237C-Rev:                                        | CCG AAG CCT TGG CAC TCT TGT GGC GTG                       |
| G241R         | G241R-For:                                        | GAG CGC CAA GGC TTC <u>AGG</u> GAA TTA CTG CAG G          |
|               | G241R-Rev:                                        | CCT GCA GTA ATT CCC TGA AGC CTT GGC GCT C                 |
| P311S         | P311S-For:                                        | TCG GCA GTG ATC ACT GTT <u>CTA</u> TCA CCC TAT ACC TA     |
|               | P311S-Rev:                                        | TAG GTA TAG GGT GAT AGA ACA GTG ATC ACT GCC GA            |
| A317V         | A317V-For:                                        | ATC ACC CTA TAC CTA <u>GTA</u> CTG TGA GGA TCC GGC        |
|               | A317V-Rev:                                        | GCC GGA TCC TCA CAG TAC TAG GTA TAG GGT GAT               |

**Table S2. Amplification primers used in *APE1* exonic sequencing.** The underlined portion is the region complementary to the *APE1* genomic sequence. The remaining portion of the oligonucleotide is the binding site for M13 forward and reverse primers used in direct sequencing of the PCR product.

| <u>Exon</u> | <u>Oligonucleotide sequence (5'-3')</u>                                                                           |
|-------------|-------------------------------------------------------------------------------------------------------------------|
| Exon 1&2    | Fex1_2: GTTTTCCCAGTCACGAC <u>GAGGCTAAGCGTCTCCGTCAC</u><br>Rex1_2: AGGAAACAGCTATGACCAT <u>CTGCGACTTCTTCACAAACC</u> |
| Exon 3      | Fex3: GTTTTCCCAGTCACGAC <u>GGTTTGTGAAGAAGTCGCAG</u><br>Rex3: AGGAAACAGCTATGACCAT <u>CCTGAAGGCTAAACGGAGAA</u>      |
| Exon 4      | Fex4: GTTTTCCCAGTCACGAC <u>GAATATTGTGCTGCTTGACTC</u><br>Rex4: AGGAAACAGCTATGACCAT <u>GGGAAAGCAATCAAGAGGTG</u>     |
| Exon 5      | Fex5: GTTTTCCCAGTCACGACTT <u>GCTAATTCTCTATCTCTG</u><br>Rex5: AGGAAACAGCTATGACCAT <u>GAGTGTTTAAAGAAGGAATGG</u>     |
